# Supplementary material for: Phenology models using herbarium specimens are only slightly improved by using finer‐scale stages of reproduction
Source: PubMed Central journal article supplement — Appl Plant Sci. 2019 Mar 7;7(3):e01225. doi: 10.1002/aps3.1225 (PMC6426165; doi:10.1002/aps3.1225), 2019-03-07

**APPENDIX S4.** Timing of different reproductive stages and leafing stages, as predicted by best fitting models at the mean elevation (545 m), year (1946), and January, February, or March temperature (8.35°C) in our data set. Small letters above each circle represent the Tukey's group that each stage falls into. For example, reproductive stages 1 and 2 both fall into group “a,” whereas reproductive stages 2 and 3 fall into group “b,” meaning that stages 1 and 2, and 2 and 3 are not statistically different from each other, but reproductive stages 1 and 3 are.

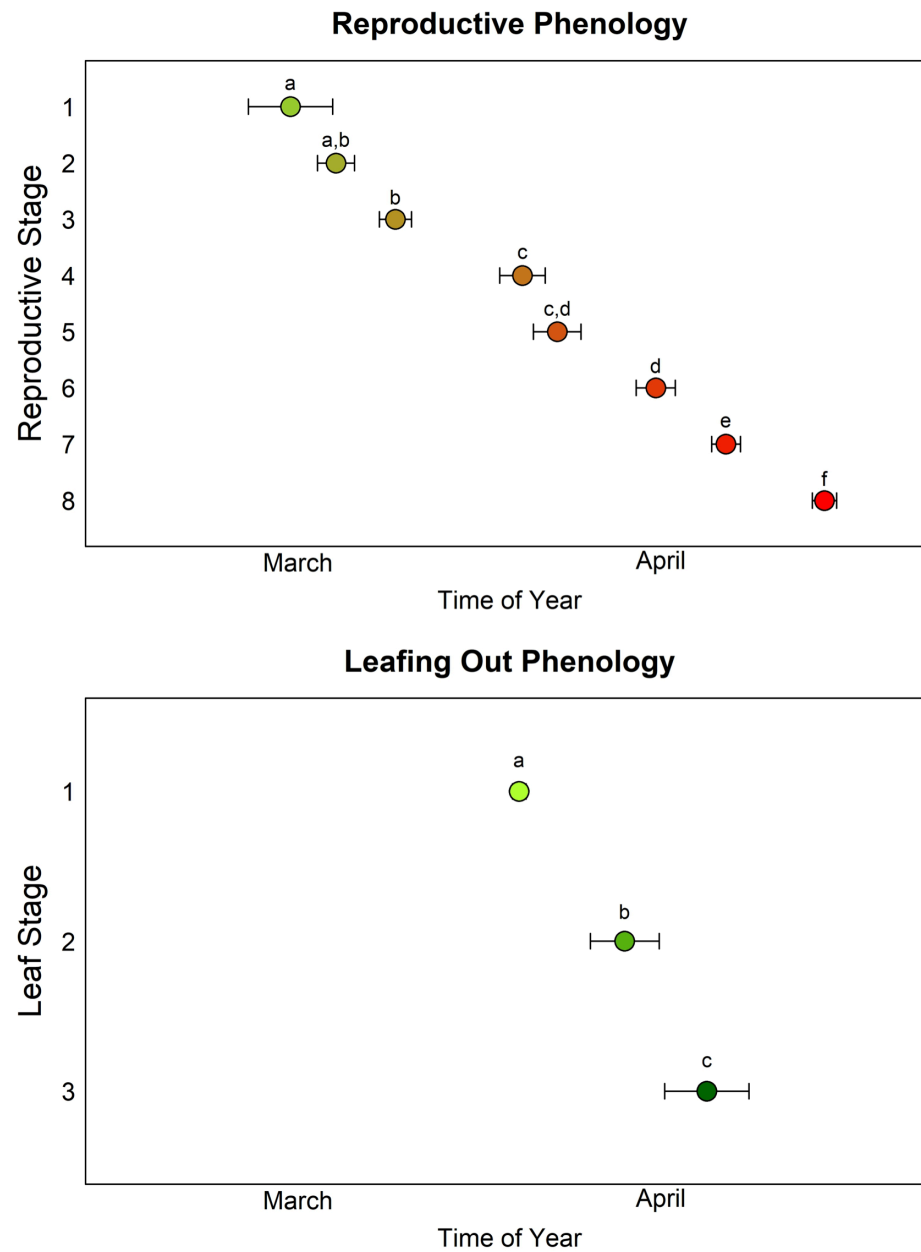

Supplement: APS3-7-e01225-s004.pdf [file APS3-7-e01225-s004.pdf]
