# Supplementary material for: Phenology models using herbarium specimens are only slightly improved by using finer‐scale stages of reproduction
Source: PubMed Central journal article supplement — Appl Plant Sci. 2019 Mar 7;7(3):e01225. doi: 10.1002/aps3.1225 (PMC6426165; doi:10.1002/aps3.1225), 2019-03-07

**APPENDIX S5.** Co-occurrence of reproductive (*y*-axis) and leafing (top *x*-axis) phenophases; overall (left), in northern states (>42.5 latitude, center), and in southern states (<32.5 latitude, right). Larger circles indicate greater co-occurrence of the two intersecting stages.

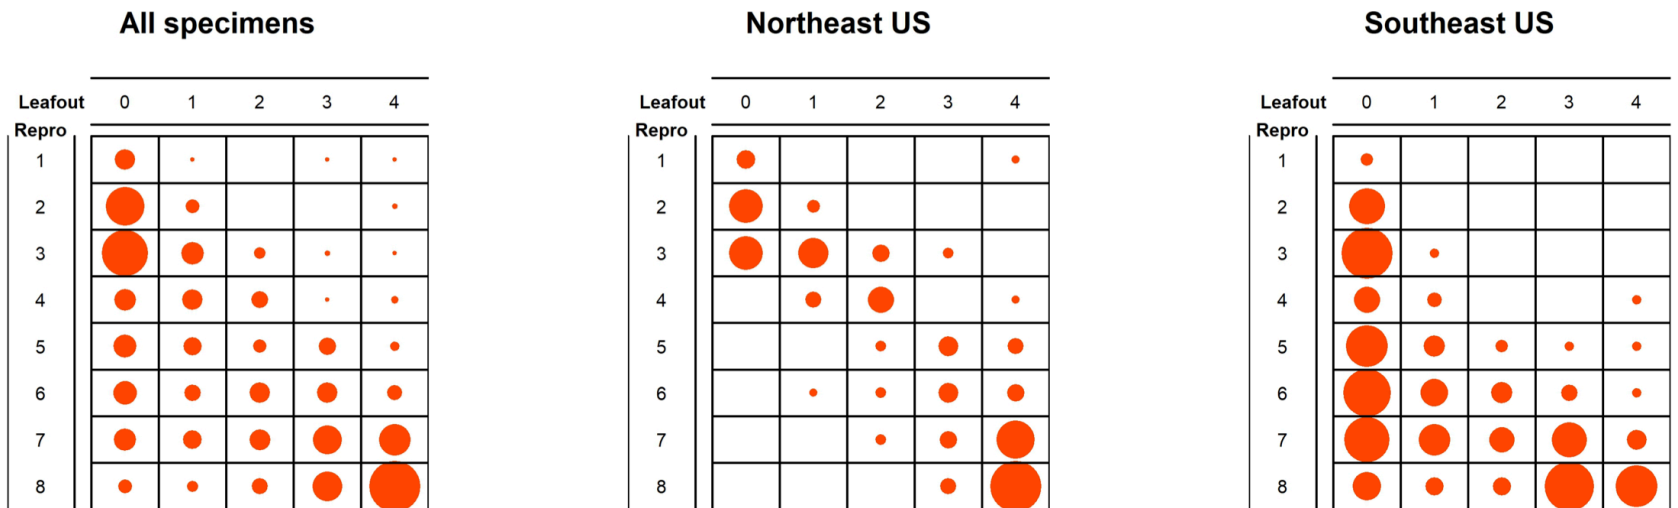

Supplement: APS3-7-e01225-s005.pdf [file APS3-7-e01225-s005.pdf]
