# Supplementary material for: Phenology models using herbarium specimens are only slightly improved by using finer‐scale stages of reproduction
Source: PubMed Central journal article supplement — Appl Plant Sci. 2019 Mar 7;7(3):e01225. doi: 10.1002/aps3.1225 (PMC6426165; doi:10.1002/aps3.1225), 2019-03-07

**APPENDIX S6.** Comparison of the effects of temperature on the timing of flowering, seed set, and leafing out. Plotted are lines representing the effect of temperature (the average of January, February, and March [JFM]) on the date of collection for specimens with flowers and seeds (in the four-stage classification scheme). Green shading marks the timing of leafing out relative to temperature, as determined by the effect of temperature on leafing stage 3.

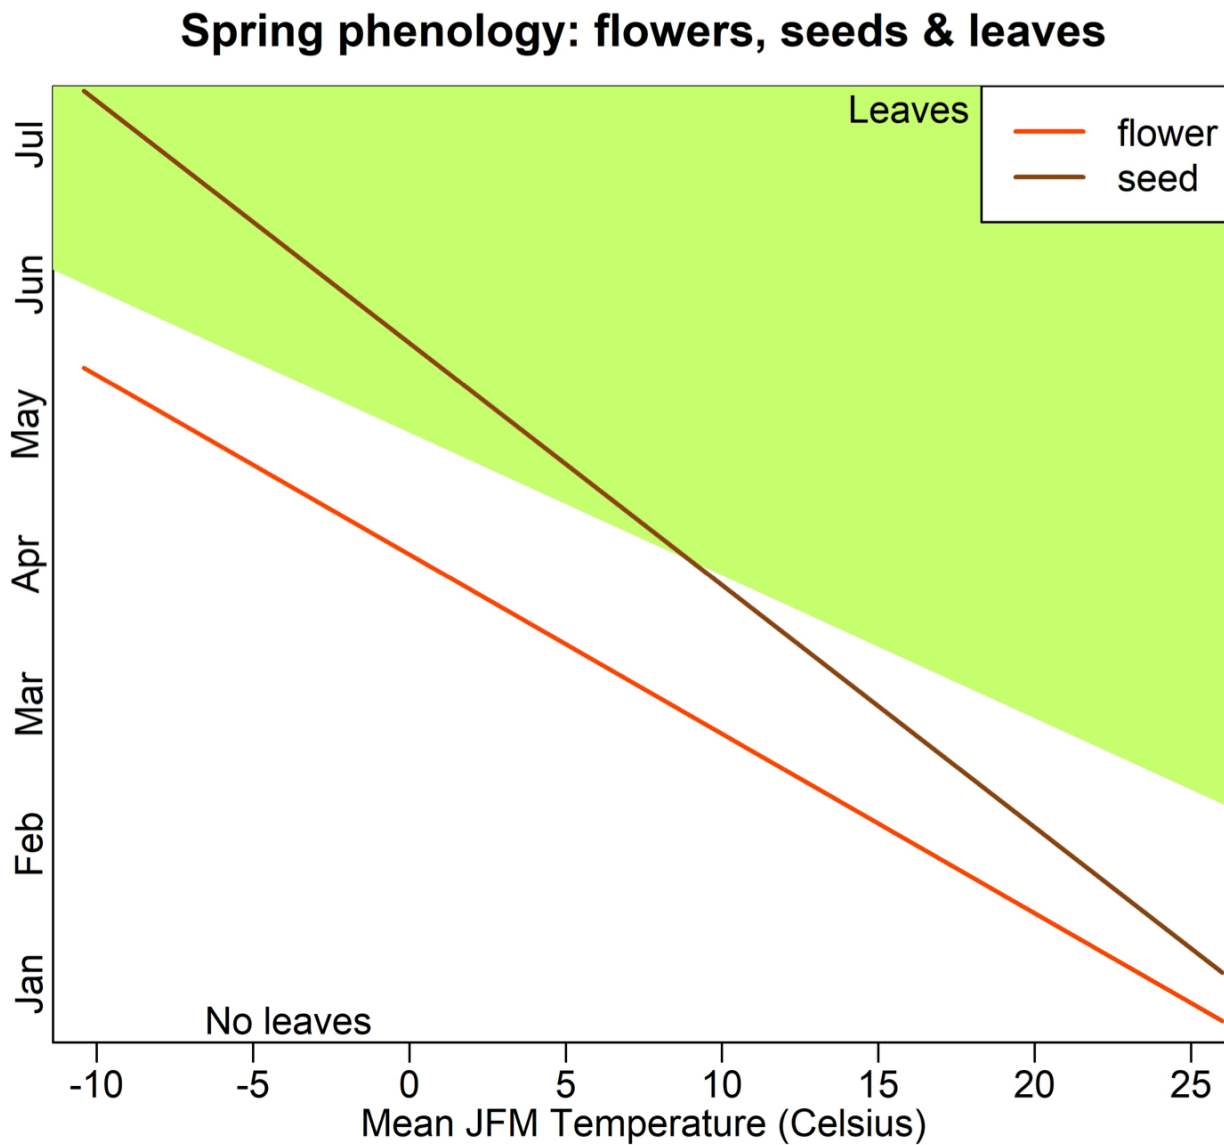

Supplement: APS3-7-e01225-s006.pdf [file APS3-7-e01225-s006.pdf]
