# Supplementary material for: Phenology models using herbarium specimens are only slightly improved by using finer‐scale stages of reproduction
Source: PubMed Central journal article supplement — Appl Plant Sci. 2019 Mar 7;7(3):e01225. doi: 10.1002/aps3.1225 (PMC6426165; doi:10.1002/aps3.1225), 2019-03-07

**APPENDIX S7.** Sensitivity analysis of classification scheme model-fit to sample size. To test the effect of sample size on model-fit, we reran our full model ( $\text{DOY} \sim \text{Elevation} + \text{Year} + \text{Temperature} * \text{Phenophase}$ ) for each classification scheme for a range of subset fractions of 0.05, 0.1, 0.2, 0.3, 0.4, 0.5, 0.75 of the original data set (corresponding number of specimens: 53, 105, 210, 315, 420, 526, and 788, respectively). For each fraction, we randomly subsampled 100 unique data sets for that given fractional amount. We then tested the fit based on Akaike information criterion (AIC) and  $R^2$  values of each classification scheme on each of the 100 subsampled data sets per fraction (total of 700 separate analyses). (A, B) The relative AIC scores and  $R^2$  for each classification scheme by subsample fraction. The values have been standardized (mean-centered) within each fraction for easy comparison between fractions. (C, D) Frequency of best-fit classification schemes by fraction based on AIC and  $R^2$  values. The frequency of classification schemes is out of the 100 randomly subsampled data sets for fraction.

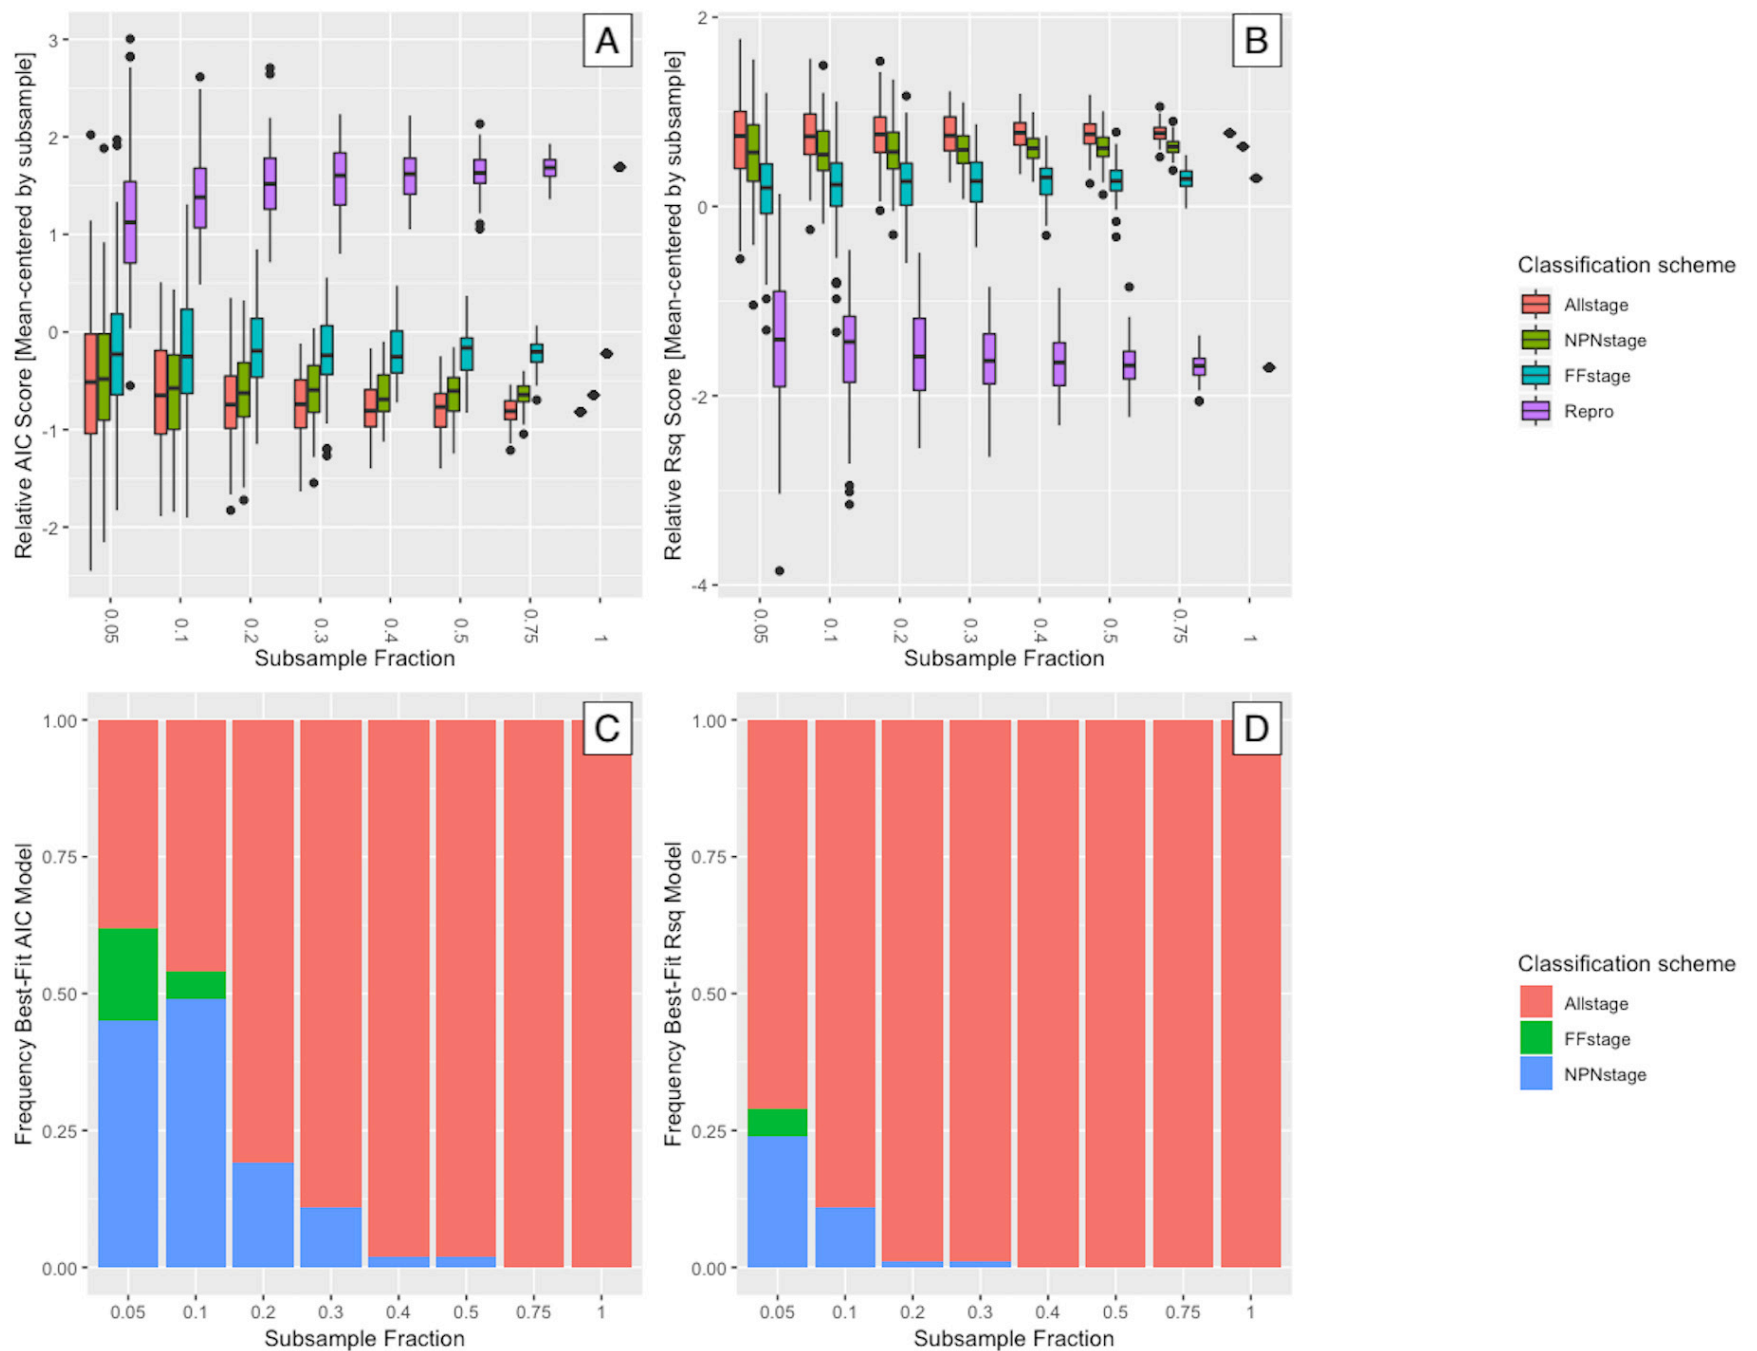

Supplement: APS3-7-e01225-s007.pdf [file APS3-7-e01225-s007.pdf]
